# Supplementary material for: Effects of Omega-3 Fatty Acids on Muscle Mass, Muscle Strength and Muscle Performance among the Elderly: A Meta-Analysis
Source: PubMed Central journal article supplement (PMC7761957; doi:10.3390/nu12123739), 2020-12-04
Supplement: nutrients-12-03739-s001.pdf [file nutrients-12-03739-s001.pdf]

(a)

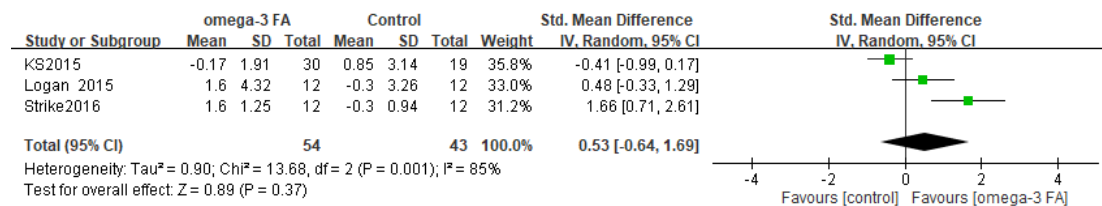

(b)

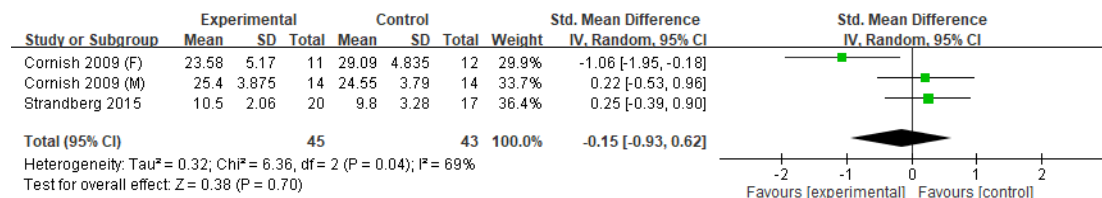

(c)

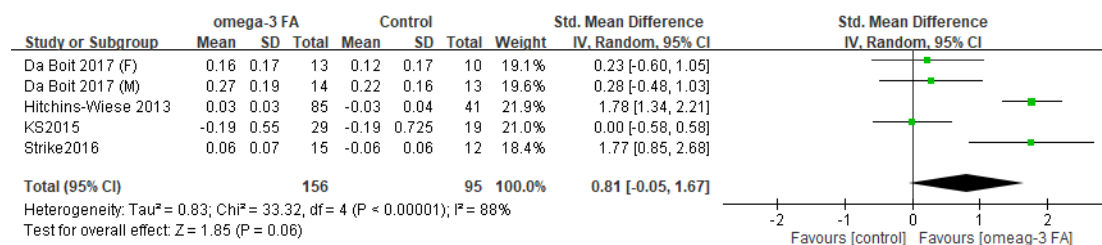

**Supplementary Figure S1.** Forest plots of the effect of n-3 PUFA supplementation on handgrip (a), one-repetition maximum strength of the leg (b), and walking speed (c).

(a)

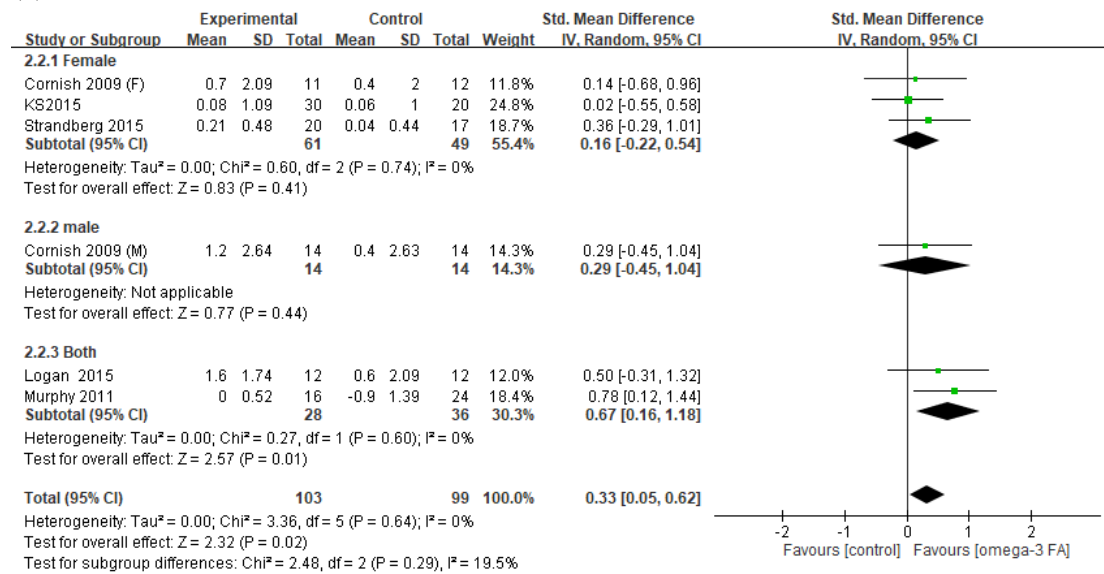

(b)

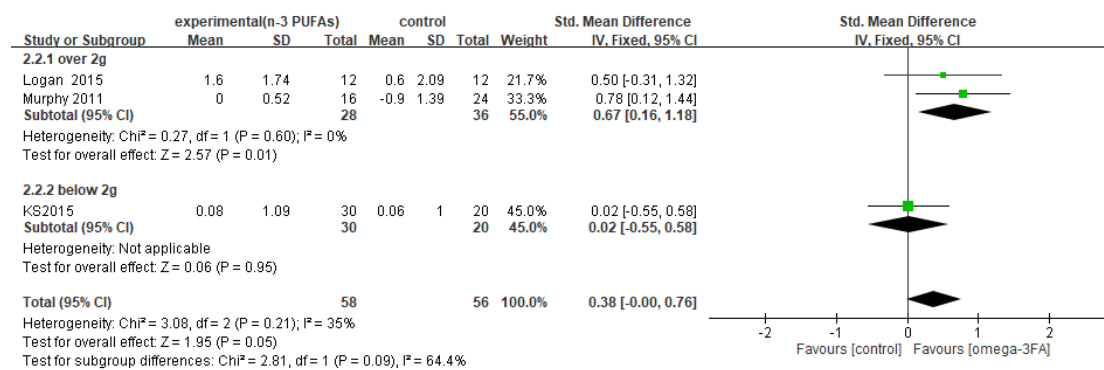

**Supplementary Figure S2.** Forest plots of the included studies assessing the effect of n-3 PUFA supplementation on muscle mass categorized by sex (a) and the dosage of n-3 PUFAs (b).

(a)

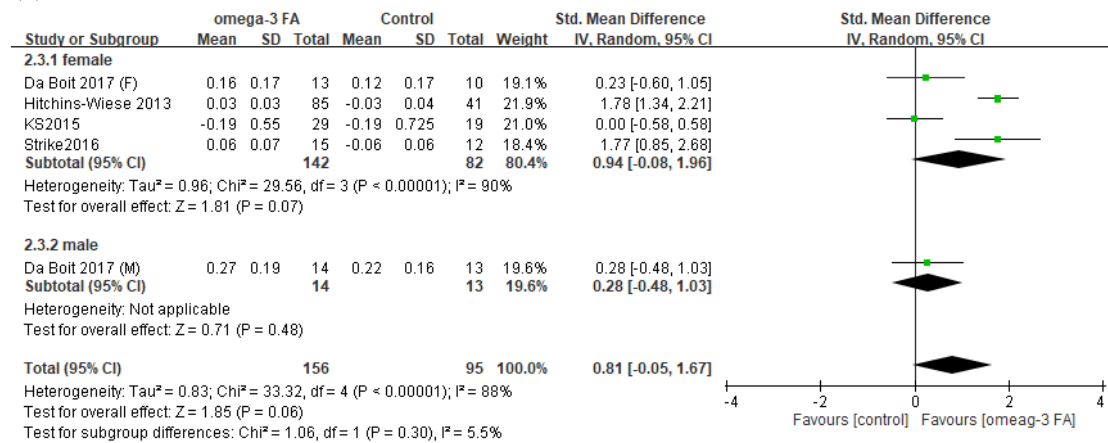

(b)

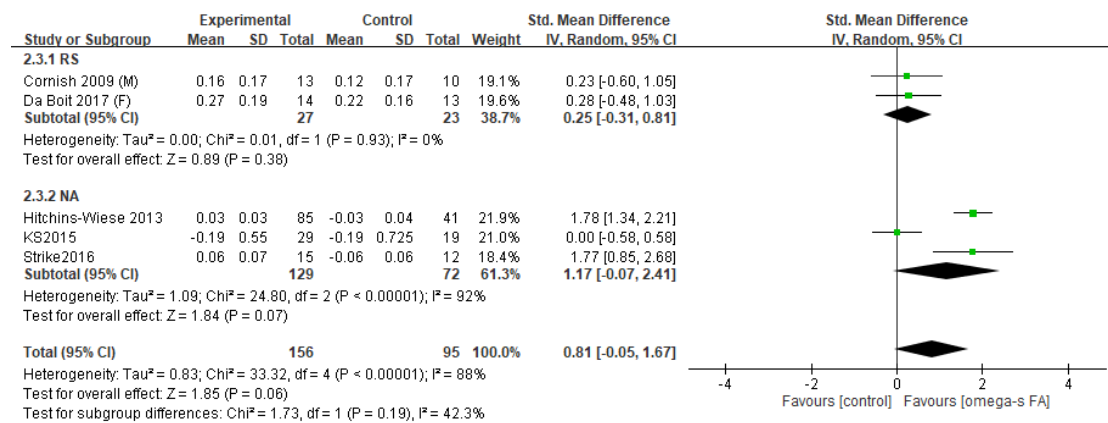

(c)

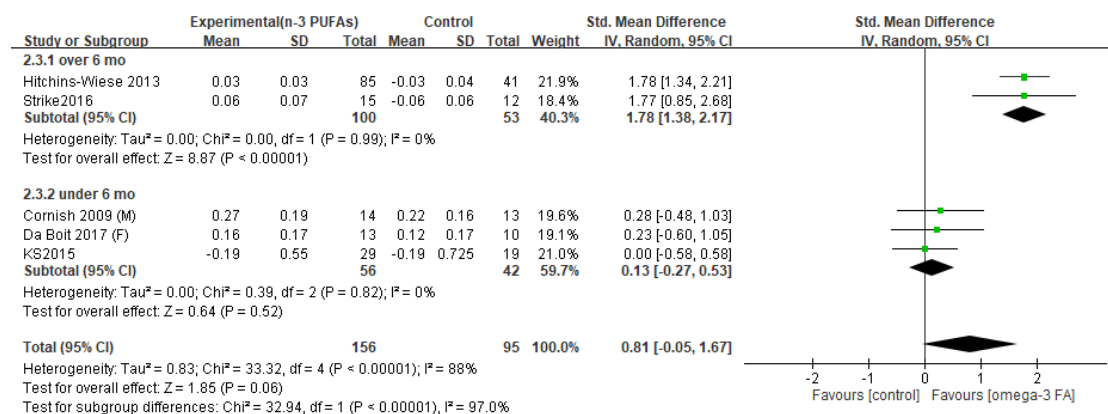

**Supplementary Figure S3.** Forest plots of the included studies assessing the effect of n-3 PUFA supplementation on walking speed categorized by sex (a), resistance training intervention (b), and the duration of supplementation (c).

(a)

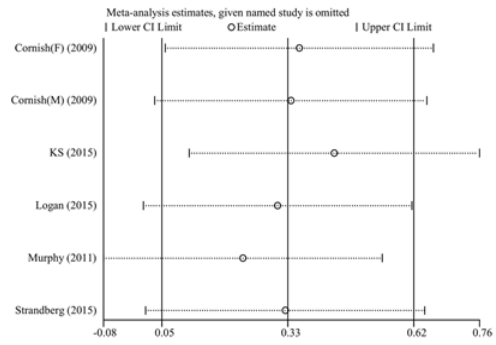

(b)

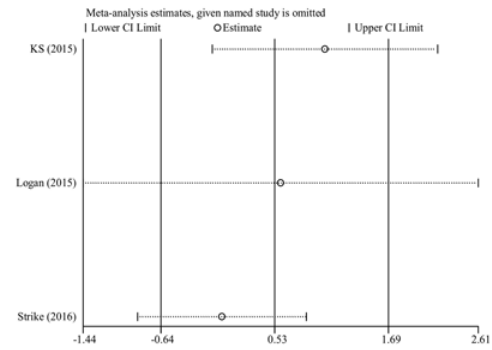

(c)

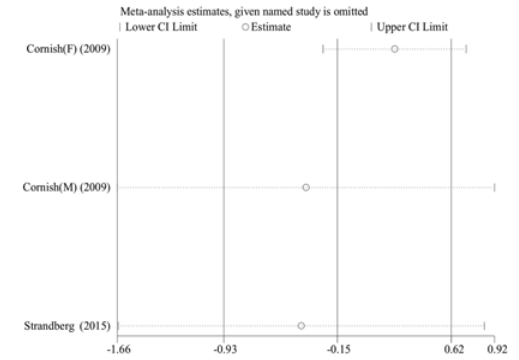

(d)

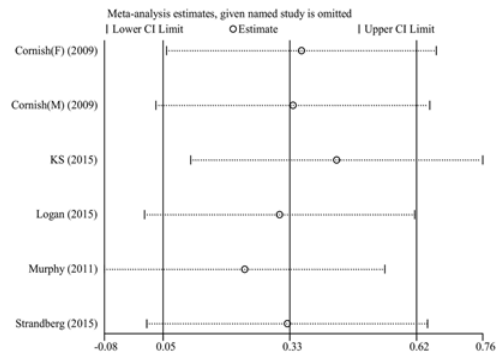

(e)

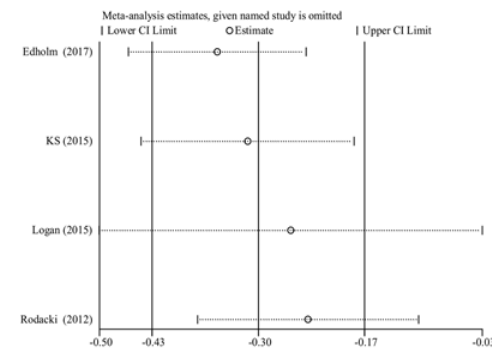

**Supplementary Figure S4.** Sensitivity analyses by muscle mass (a), handgrip strength (b), one-repetition maximum strength of the leg (c), walking speed (d), and the timed up and go test result (e).

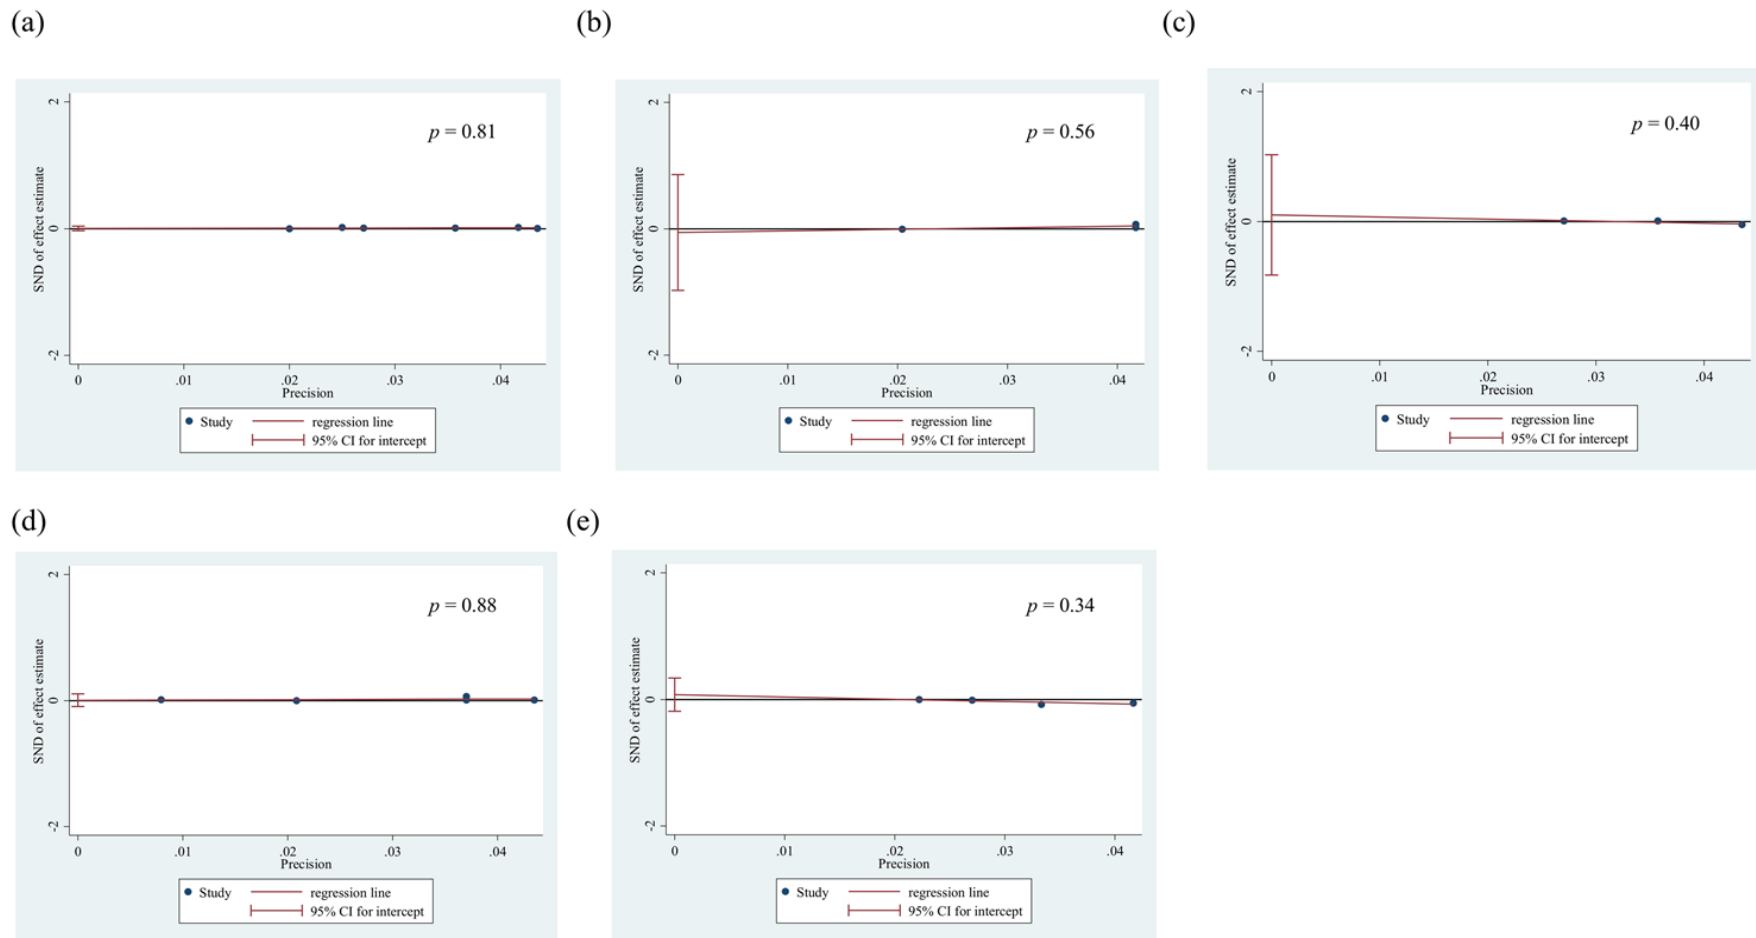

**Supplementary Figure S5.** Charts of Egger's test of muscle mass (a), handgrip strength (b), one-repetition maximum strength of the leg (c), walking speed (d), and the timed up and go test result (e).
